# Supplementary material for: Drug screening and genome editing in human pancreatic cancer organoids identifies drug-gene interactions and candidates for off-label therapy
Source: PubMed Central journal article supplement — Cell Genom. 2022 Feb 9;2(2):100095. doi: 10.1016/j.xgen.2022.100095 (PMC7612395; doi:10.1016/j.xgen.2022.100095), 2022-02-09
Supplement: EMS142131-supplement-Key_resources_table.pdf [file EMS142131-supplement-Key_resources_table.pdf]

## STAR Methods

### KEY RESOURCES TABLE

| REAGENT or RESOURCE                           | SOURCE                         | IDENTIFIER  |
|-----------------------------------------------|--------------------------------|-------------|
| Antibodies                                    |                                |             |
| anti-p53                                      | DAKO                           | DO-7        |
| anti-Smad4                                    | Santa Cruz Biotech             | sc-7966     |
| anti-Actin                                    | Cell Signaling                 | 4970        |
| anti-BRCA2                                    | Merck                          | OP95        |
| anti-ARID1a                                   | Novusbio                       | NBPI-88932  |
| anti-mouse IgG-HRP                            | Merck                          | 401253      |
| anit-rabbit IgG-HRP                           | Cell Signaling                 | 7074P2      |
| Bacterial and virus strains                   |                                |             |
| Stbl3                                         | Zymo Research                  | T3002       |
| Chemicals, peptides, and recombinant proteins |                                |             |
| Drug Compounds                                | Listed also in Table S6        |             |
| TrypLE Express                                | Thermo Fisher Scientific       | 12605010    |
| HEPES                                         | Thermo Fisher Scientific       | 15630080    |
| Penicillin-Streptomycin                       | Thermo Fisher Scientific       | 15140122    |
| GlutaMAX Supplement                           | Thermo Fisher Scientific       | 35050038    |
| Matrigel, growth factor reduced               | Corning                        | 356231      |
| BME, Path Clear                               | Cultrex                        | 3533-005-02 |
| B-27 Supplement                               | Thermo Fisher Scientific       | 17504044    |
| [Leu15]-Gastrin I human                       | Tocris                         | 3006        |
| Recombinant Mouse EGF                         | Peptotech                      | AF10015     |
| Fibroblast growth Factor 10                   | Peptotech                      | 10026       |
| Afamin-Wnt-3A serum-free conditioned medium   | Cell line gift from H. Clevers | N/A         |
| R-spondin-1 conditioned medium                | Cell line gift from H. Clevers | N/A         |
| Noggin conditioned medium                     | Cell line gift from H. Clevers | N/A         |
| A83-01                                        | Tocris                         | 2939        |
| Y-27632                                       | AbMole                         | M1817       |
| Prostaglandin E2                              | Tocris                         | 2296        |
| Nicotinamide                                  | Sigma                          | N0636       |
| Fetal bovine serum                            | Sigma                          | F7524-500ML |
| Cell Recovery Solution                        | Corning                        | 354253      |
| Collagenase Type II                           | Thermo Fisher Scientific       | 17101015    |
| Puromycin                                     | InvivoGen                      | ant-pr-1    |
| Blasticidin                                   | InvivoGen                      | ant-bl-5b   |
| Advanced DMEM/F12                             | Thermo Fisher Scientific       | 12634028    |
| DMEM, high Glucose                            | Thermo Fisher Scientific       | 31966047    |
| RPMI 1640                                     | Thermo Fisher Scientific       | 61870010    |
| PBS                                           | Thermo Fisher Scientific       | 10010015    |
| Polyethylenimine Max                          | Chemie Brunschweig AG          | 24765-2     |
| Polybrene                                     | Sigma                          | TR-1003-G   |
| Thrombin                                      | Baxter                         | Tisseel     |
| Human Plasma                                  | UZH Transfusion Center         | N/A         |
| Hematoxylin                                   | Sigma                          | MHS32-1L    |

|                                                        |                           |                                                                                                               |
|--------------------------------------------------------|---------------------------|---------------------------------------------------------------------------------------------------------------|
| Eosin Y                                                | Sigma                     | E4009-5G                                                                                                      |
| Protease Inhibitor cOmplete                            | Roche                     | DRUM4-000-050                                                                                                 |
| Phosphatase Inhibitor PhosSTOP                         | Roche                     | 4906837001                                                                                                    |
| NuPage Sample Reducing Agent 10x                       | Thermo Fisher Scientific  | NP0004                                                                                                        |
| NuPage LDS Sample Buffer 4x                            | Thermo Fisher Scientific  | NP0007                                                                                                        |
| NuPage 3-8% Tris-Acetate Gradient Gels                 | Thermo Fisher Scientific  | EA0375BOX                                                                                                     |
| Amersham Protean NC Nitrocellulose Membrane            | GE Healthcare             | 10738328103                                                                                                   |
| BSA Fraction V                                         | Roche                     | 10600015                                                                                                      |
| Western Bright Quantum                                 | Advansta                  | K-12042-D10                                                                                                   |
| DMSO                                                   | Sigma                     | D8418                                                                                                         |
| BsmBI                                                  | NEB                       | R0580S                                                                                                        |
| Fast SYBR Green PCR Master Mix                         | Thermo Fisher Scientific  | 4385612                                                                                                       |
| GoScript Reverse Transcription System                  | Promega                   | A5000                                                                                                         |
| Promega Bright-Glo Reagent                             | Promega                   | E2610                                                                                                         |
| Cell Titer Glo 3D                                      | Promega                   | G9618                                                                                                         |
| Critical commercial assays                             |                           |                                                                                                               |
| RNeasy Kit                                             | QIAGEN                    | 51106                                                                                                         |
| Dneasy Blood and Tissue Kit                            | QIAGEN                    | 69506                                                                                                         |
| Pierce BCA Protein Assay                               | Thermo Fisher Scientific  | 23227                                                                                                         |
| Deposited data                                         |                           |                                                                                                               |
| DNA and RNA sequencing and SNP Array data              | This study                | SRA, GEO                                                                                                      |
| Original Western blot images                           | This study                | <a href="https://doi.org/10.6084/m9.figshare.18407564.v1">https://doi.org/10.6084/m9.figshare.18407564.v1</a> |
| Experimental models: Cell lines                        |                           |                                                                                                               |
| Human: pancreas organoids and cell lines: see Table S1 | This study                |                                                                                                               |
| Mouse: pancreas organoids: see Table S1                | This study                |                                                                                                               |
| Experimental models: Organisms/strains                 |                           |                                                                                                               |
| Mouse: NMRI nu/nu mice                                 | Charles River             | N/A                                                                                                           |
| Mouse: NOD.Cg-Prkdcscid Il2rgtm1Wjl/SzJ                | Jackson Laboratory        | N/A                                                                                                           |
| Oligonucleotides                                       |                           |                                                                                                               |
| sgRNA_ARID1a_1                                         | CACCgTCCTGCAGCTCCTTTCCCAG | aaacCTGGGAAAGGAGCTGCAGGAc                                                                                     |
| sgRNA_ARID1a_2                                         | CACCgGGCCGAGCGCGGGGAAATGA | aaacTCATTTCCCCGCGCTCGGCCc                                                                                     |
| sgRNA_ARID1a_3                                         | CACCgAAAGCGAGGGCCCCGCCGTG | aaacCACGGCGGGGCCCTCGCTTTc                                                                                     |
| sgRNA_BRCA2_1                                          | CACCgGGGTTTCTCTTATCAACACG | aaacCGTGTTGATAAGAGAAACCCc                                                                                     |
| sgRNA_BRCA2_2                                          | CACCgCAAAGTTAAGGGAGTGTTAG | aaacCTAACACTCCCTTAACCTTTGc                                                                                    |
| sgRNA_BRCA2_3                                          | CACCgACGTCTAGACAAAATGTATC | aaacGATACATTTGTCTAGACGTc                                                                                      |

|                               |                                   |                                                                                                                                                                 |
|-------------------------------|-----------------------------------|-----------------------------------------------------------------------------------------------------------------------------------------------------------------|
| qPCR Primer: ACTB             | TGCGTGACATTAAGGAGAAG              | TGAAGGTAGTTT<br>CGTGGATG                                                                                                                                        |
| qPCR Primer: BRCA2            | TGCCTGAAAACCAGATGACTAT<br>C       | AGGCCAGCAAAC<br>TTCCGTTA                                                                                                                                        |
| qPCR Primer: TBP              | TGGACTGTTCTTCACTCTTGGC            | TTCGGAGAGTTC<br>TGGGATTGT                                                                                                                                       |
| qPCR Primer: BNIP3            | CTGGGTAGAACTGCACTTCAG             | GGAGCTACTTCG<br>TCCAGATTCAT                                                                                                                                     |
| qPCR Primer: CAIX             | GCAGGAGGATTCCCCCTTG               | GGAGCCTCAACA<br>GTAGGTAGAT                                                                                                                                      |
| qPCR Primer: GLUT1            | ATTGGCTCCGGTATCGTCAAC             | GCTCAGATAGGA<br>CATCCAGGGTA                                                                                                                                     |
| qPCR Primer: HK2              | GAGCCACCACTCACCTACT               | CCAGGCATTTCG<br>CAATGTG                                                                                                                                         |
| qPCR Primer: PKM1             | GCCTGCTGTGTCCGAGAAG               | CAGATGCCTTGC<br>GGATGAATG                                                                                                                                       |
| qPCR Primer: VEGFA            | CGCAGCTACTGCCATCCAAT              | TCGGCTTGTCAC<br>ATTTTTCTTGT                                                                                                                                     |
| qPCR Primer: ATF4             | AGCACTCAGACTACGTGCACCT<br>CT      | GAAGAGTCAATA<br>CCGCCAGAATCC                                                                                                                                    |
| qPCR Primer: CHOP             | CAGAACCAGCAGAGGTCACA              | AGCTGTGCCACT<br>TTCCTTTC                                                                                                                                        |
| qPCR Primer: GABARAPL1        | TCGGAAAAAGGAAGGAGAAA              | TGGCCAACAGTA<br>AGGTCAGA                                                                                                                                        |
| qPCR Primer: P62              | CCCGTCTACAGGTGAACTCC              | CTGGGAGAGGGA<br>CTCAATCA                                                                                                                                        |
| sgRNA_ARID1a_1                | CACCgTCCTGCAGCTCCTTTCCC<br>AG     | aaacCTGGGAAAG<br>GAGCTGCAGGAc                                                                                                                                   |
| Recombinant DNA               |                                   |                                                                                                                                                                 |
| pLenti HRE-Luc pGK Hygro      | Addgene                           | 118706                                                                                                                                                          |
| lentiCRISPR v2-Blast          | Addgene                           | 83480                                                                                                                                                           |
| Software and algorithms       |                                   |                                                                                                                                                                 |
| BWA mem                       | arXiv:1303.3997                   | <a href="https://github.com/lh3/bwa">https://github.com/lh3/bwa</a>                                                                                             |
| Picard Tools (MarkDuplicates) | Broad Institute                   | <a href="http://broadinstitute.github.io/picard/">http://broadinstitute.github.io/picard/</a>                                                                   |
| BamClipOverlap                | N/A                               | <a href="https://github.com/mgag/ngs-bits/blob/master/doc/tools/BamClipOverlap.md">https://github.com/mgag/ngs-bits/blob/master/doc/tools/BamClipOverlap.md</a> |
| GATK IndelRealigner           | Broad Institute                   | <a href="https://software.broadinstitute.org/gatk/">https://software.broadinstitute.org/gatk/</a>                                                               |
| GATK Unified Genotyper        | Broad Institute                   | <a href="https://software.broadinstitute.org/gatk/">https://software.broadinstitute.org/gatk/</a>                                                               |
| Bcftools caller               | doi:10.1093/bioinformatics/btx100 | <a href="https://samtools.github.io/bcftools/bcftools.html">https://samtools.github.io/bcftools/bcftools.html</a>                                               |
| Freebayes                     | arXiv:1207.3907                   | <a href="https://github.com/freebayes/freebayes">https://github.com/freebayes/freebayes</a>                                                                     |
| MuTect                        | doi:10.1038/nbt.2514              | <a href="https://github.com/broadinstitute/mutect">https://github.com/broadinstitute/mutect</a>                                                                 |

|                          |                                   |                                                                                                                                                           |
|--------------------------|-----------------------------------|-----------------------------------------------------------------------------------------------------------------------------------------------------------|
| VarScan2                 | doi:10.1101/gr.129684.111         | <a href="https://github.com/Jeltje/varsan2">https://github.com/Jeltje/varsan2</a>                                                                         |
| Strelka                  | doi:10.1093/bioinformatics/bts271 | <a href="https://github.com/target/strelka">https://github.com/target/strelka</a>                                                                         |
| Snpeff, SnpSift          | doi:10.4161/fly.19695             | <a href="http://pcingola.github.io/SnpEff/">http://pcingola.github.io/SnpEff/</a>                                                                         |
| dbNSFP                   | doi:10.1002/humu.22376            | <a href="http://database.liulab.science/dbNSFP">http://database.liulab.science/dbNSFP</a>                                                                 |
| SeqPurge                 | doi:10.1186/s12859-016-1069-7     | <a href="https://github.com/mgag/ngs-bits/blob/master/doc/tools/SeqPurge.md">https://github.com/mgag/ngs-bits/blob/master/doc/tools/SeqPurge.md</a>       |
| Biceseq2                 | doi:10.1093/nar/gkw491            | <a href="https://github.com/ding-lab/BICSEQ2">https://github.com/ding-lab/BICSEQ2</a>                                                                     |
| Picnic                   | doi:10.1093/biostatistics/kxp045  | <a href="https://www.sanger.ac.uk/tool/picnic/">https://www.sanger.ac.uk/tool/picnic/</a>                                                                 |
| Cellario 3.2             | HighRes Biosolutions Ltd.         | <a href="http://hiresbio.s1084.sureserver.com/software/cellario-32.php">http://hiresbio.s1084.sureserver.com/software/cellario-32.php</a>                 |
| CLC Genomic Workbench 11 | Qiagen Bioinformatics             | <a href="https://www.qiagenbioinformatics.com/products/clc-genomics-workbench/">https://www.qiagenbioinformatics.com/products/clc-genomics-workbench/</a> |
| Prism 8                  | GraphPad                          | <a href="https://www.graphpad.com/scientific-software/prism/">https://www.graphpad.com/scientific-software/prism/</a>                                     |
| MuSiCa                   | doi:10.1186/s12859-018-2234-y     | <a href="http://bioinfo.ciberehd.org:3838/MuSiCa/">http://bioinfo.ciberehd.org:3838/MuSiCa/</a>                                                           |
